# Supplementary material for: Time trends in infectious and chronic disease consultations in Dakar, Senegal: Impact of Covid-19 Sanitary Measures
Source: bioRxiv or medRxiv preprint supplement (doi:10.1101/2020.11.26.20239129), 2020-11-30
Supplement: Supplementary file [file media-1.pdf]

## Supplemental Data

- **e-Figure 1.** Flowchart of Sample Selection.
- **e-Figure 2.** Number of emergency medical consultations for chronic and infectious diseases by age group (panel a) and gender (panel b) over a 5-year period.
- **e-Figure 3.** Broad diagnostic categories of emergency medical consultations for chronic and infectious diseases by age group (Panel a) and gender (Panel b) over a 5-year period.
- **e-Figure 4.** Number of emergency medical consultations for Cardiovascular (Panel a), Non-Traumatic Rheumatology (Panel b), Psychiatry and Psychological (Panel c), and Ear Nose and Throat and Stomatology (Panel d) disease over a 5-year period
- **e-Table 1.** Characteristics of the consultations from April to May (2020) as compared to June to July (2020).

**e-Figure 1: Flow chart of Sample Selection**

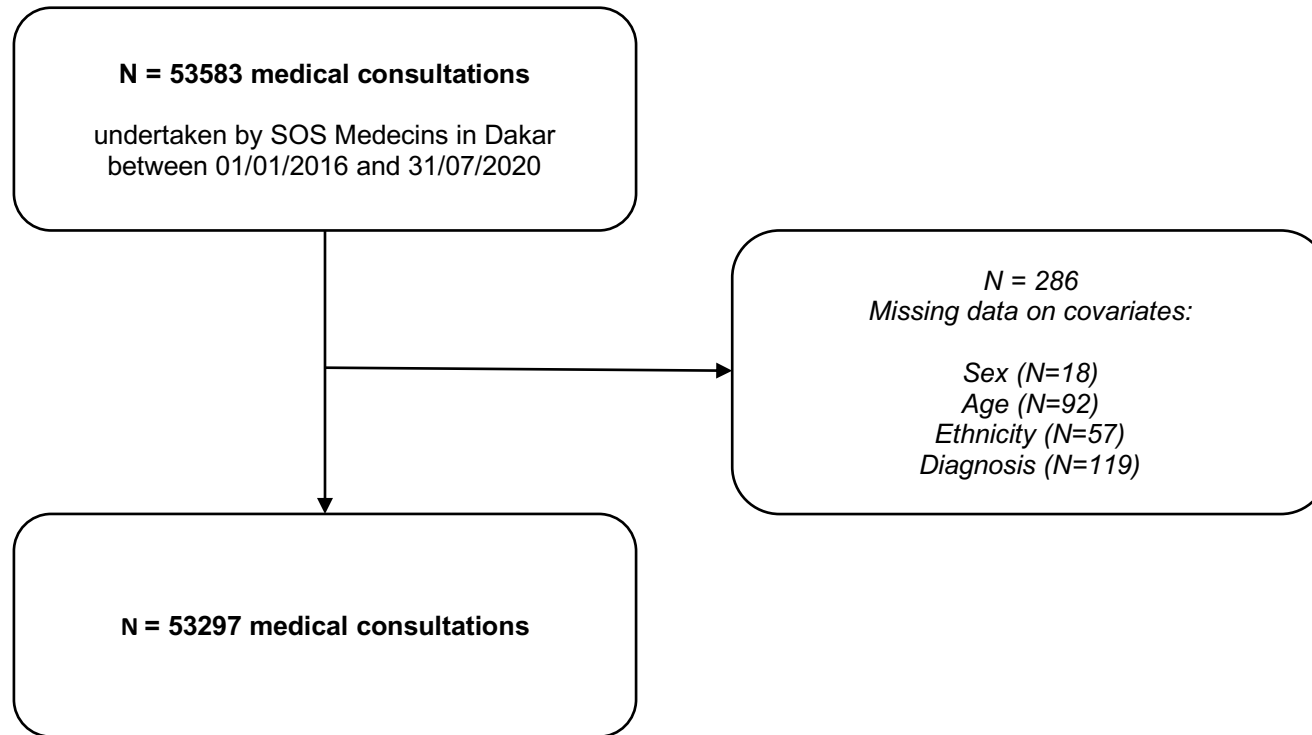

e-Figure 2: Number of emergency medical consultations for chronic and infectious diseases by age group (panel a) and gender (panel b) over a 5-year period.

Panel a

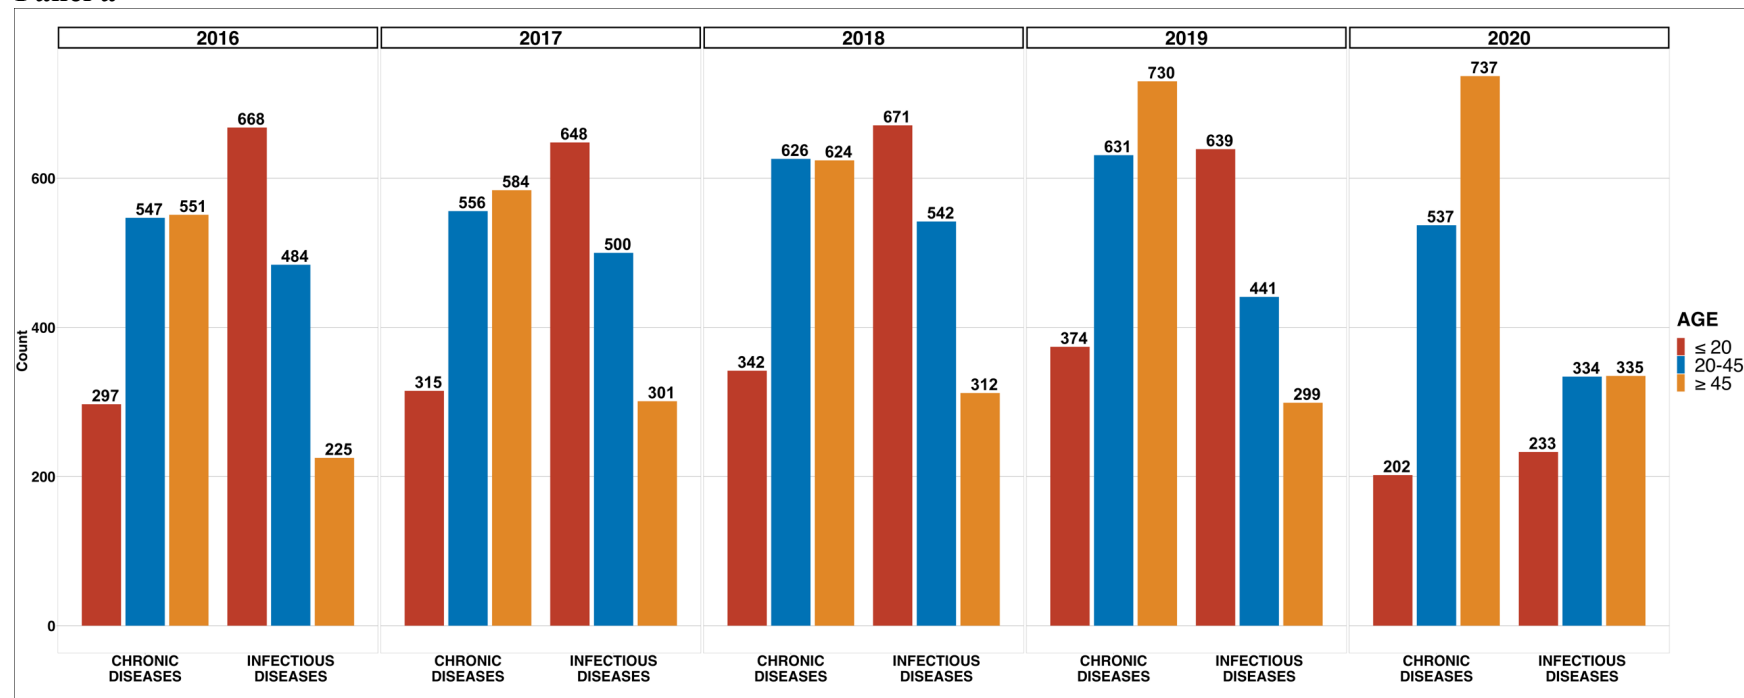

Panel b

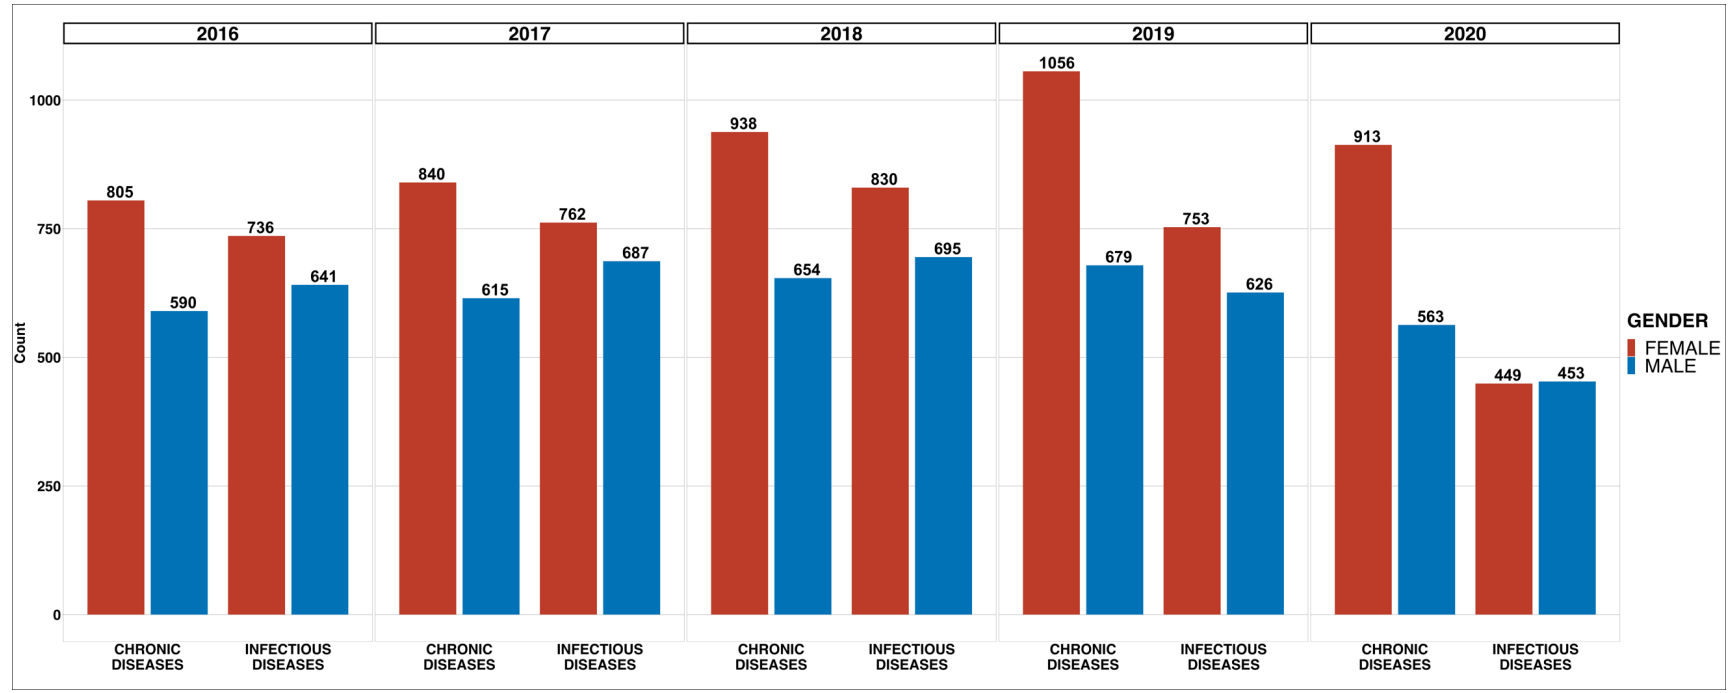

e-Figure 3: Broad diagnostic categories of emergency medical consultations for chronic and infectious diseases by age group (Panel a) and gender (Panel b) over a 5-year period.

Panel a

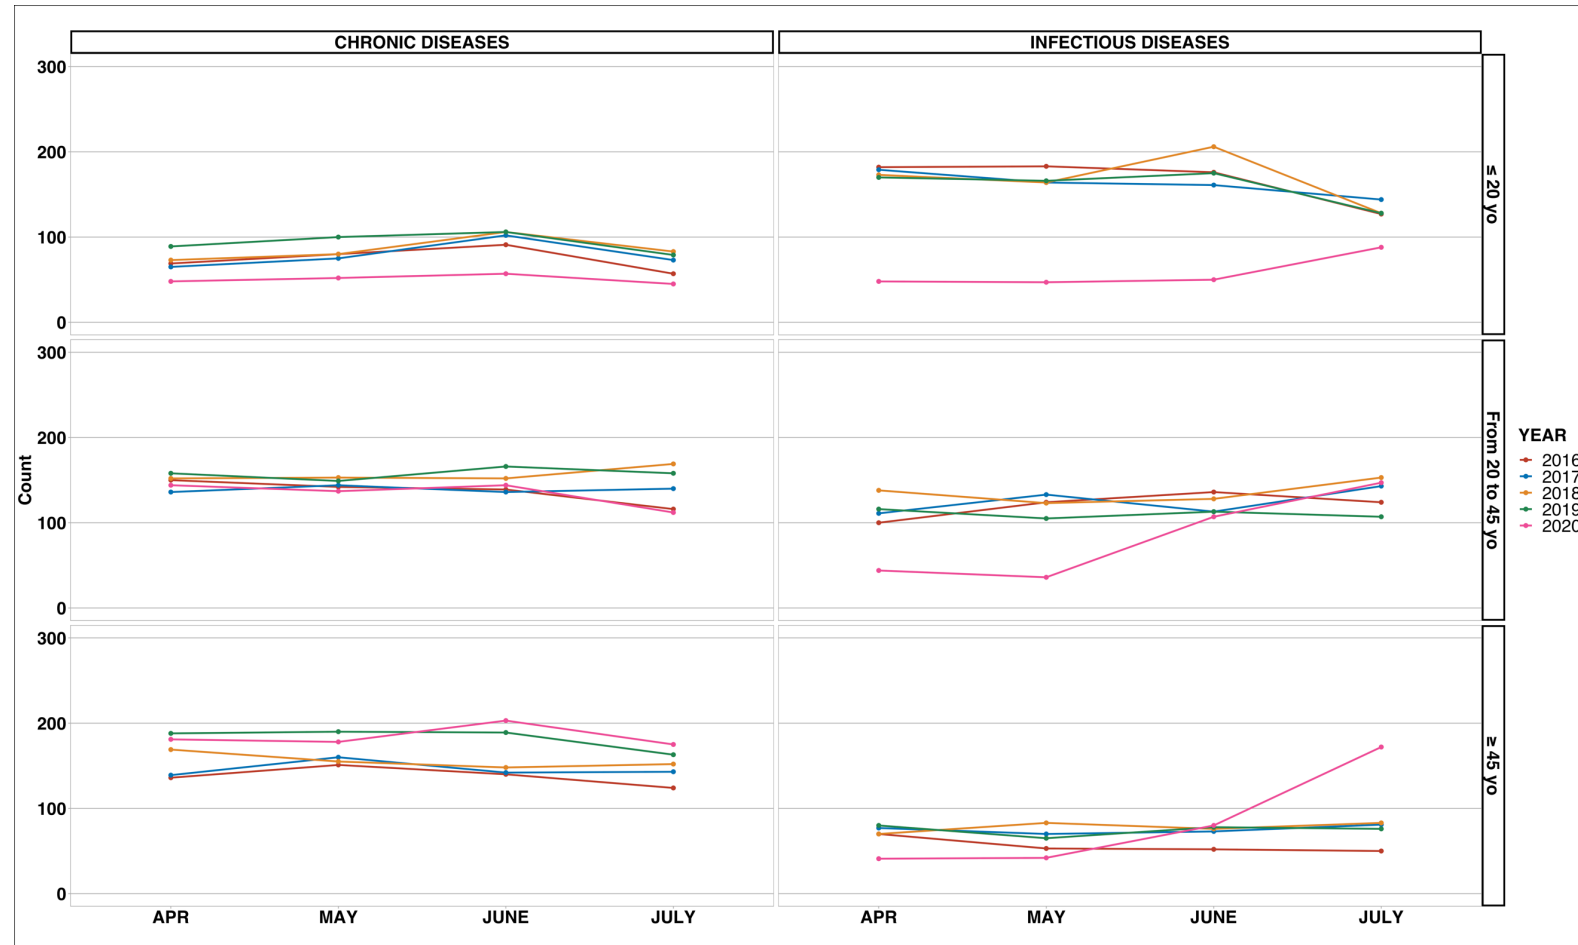

Panel b

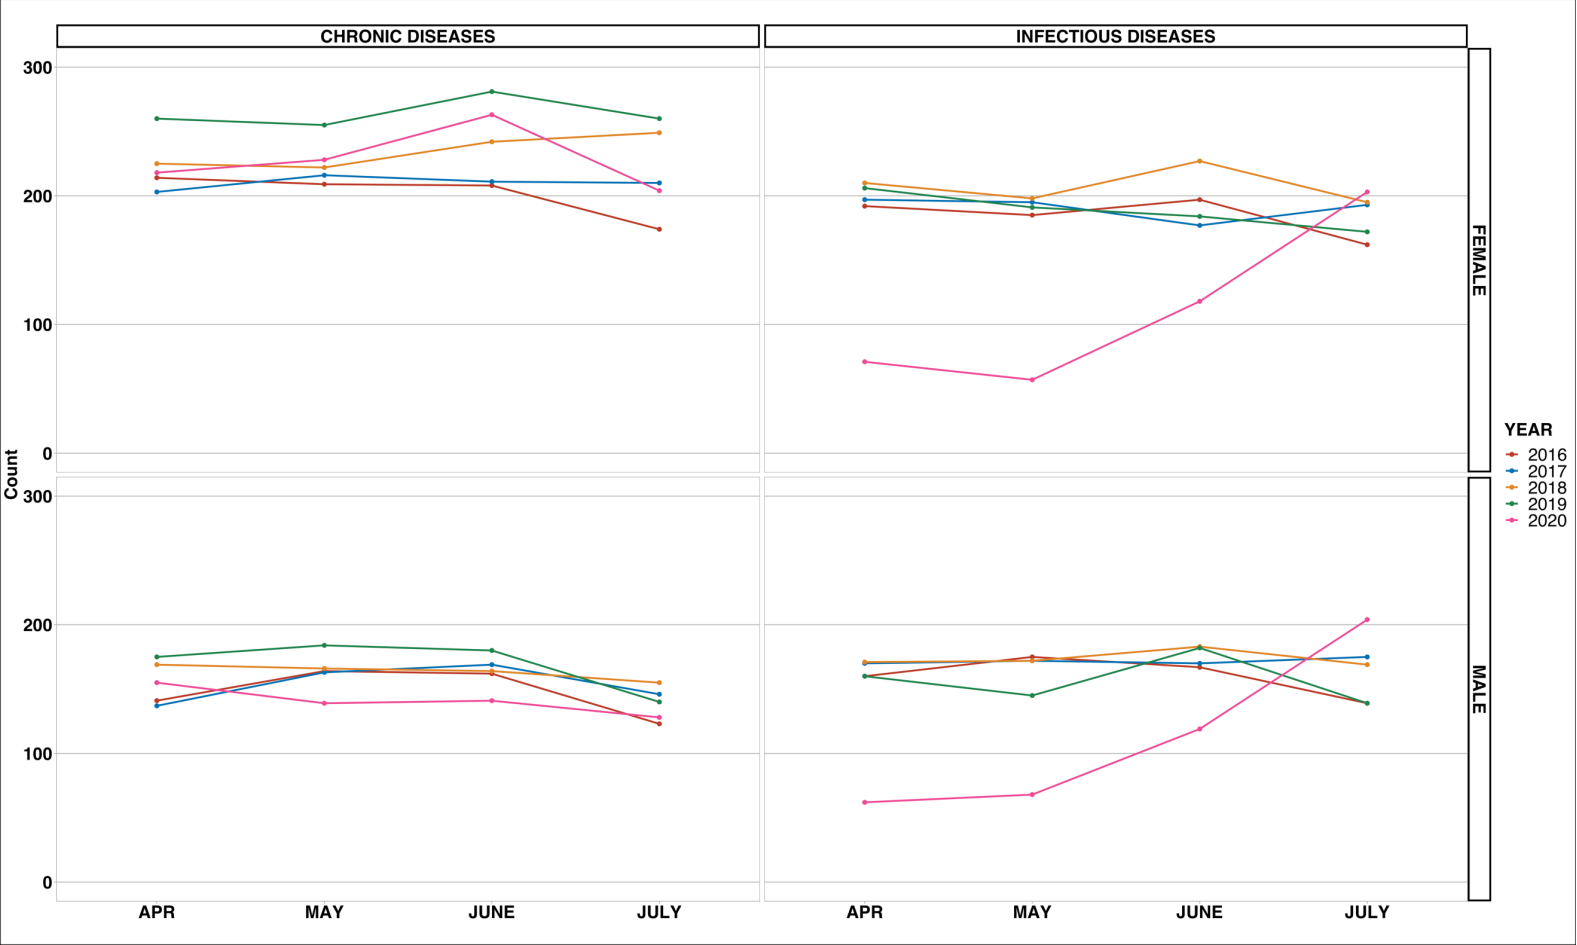

**e-Figure 4: Broad diagnostic categories of emergency medical consultations by Cardiovascular (Panel a), Non-Traumatic Rheumatology (Panel b), Psychiatry and Psychological conditions (Panel c), and ENT and infectious Stomatology (Panel d) disease over a 5-year period**

**Panel a**

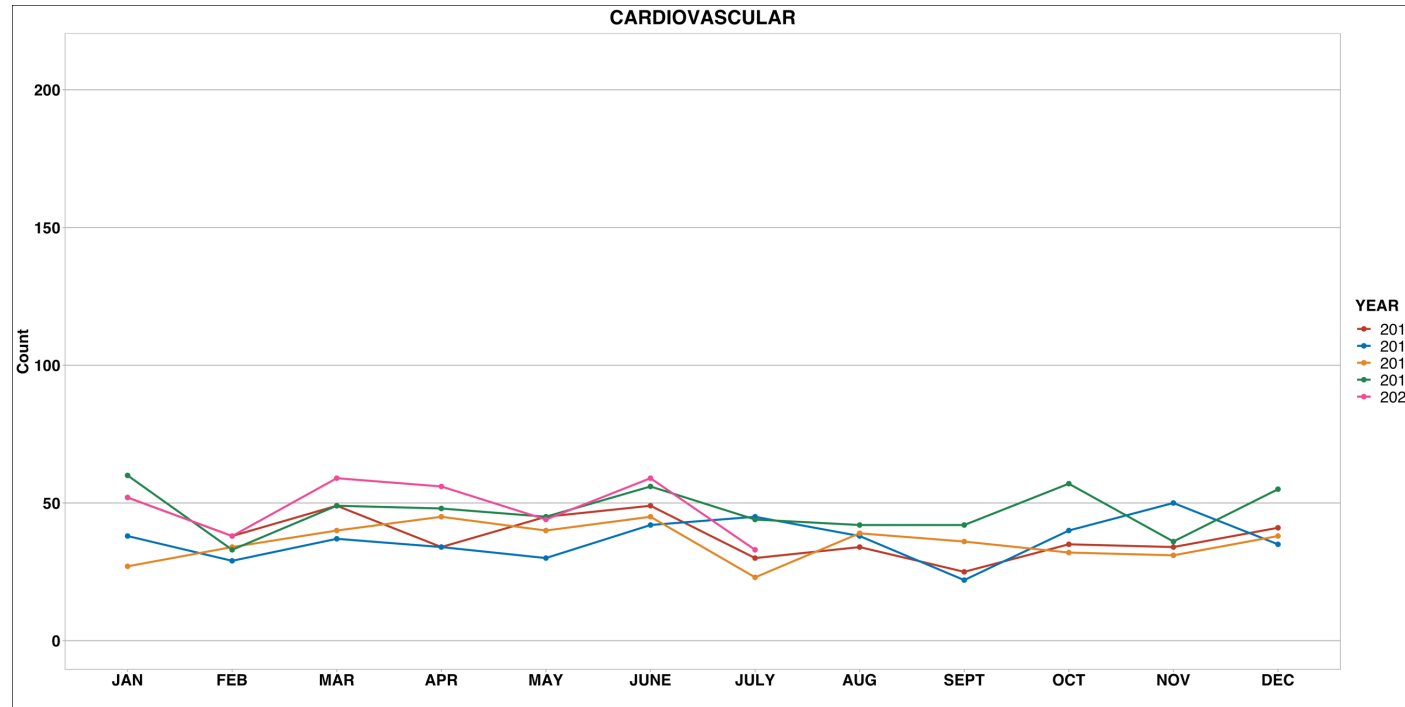

Panel b

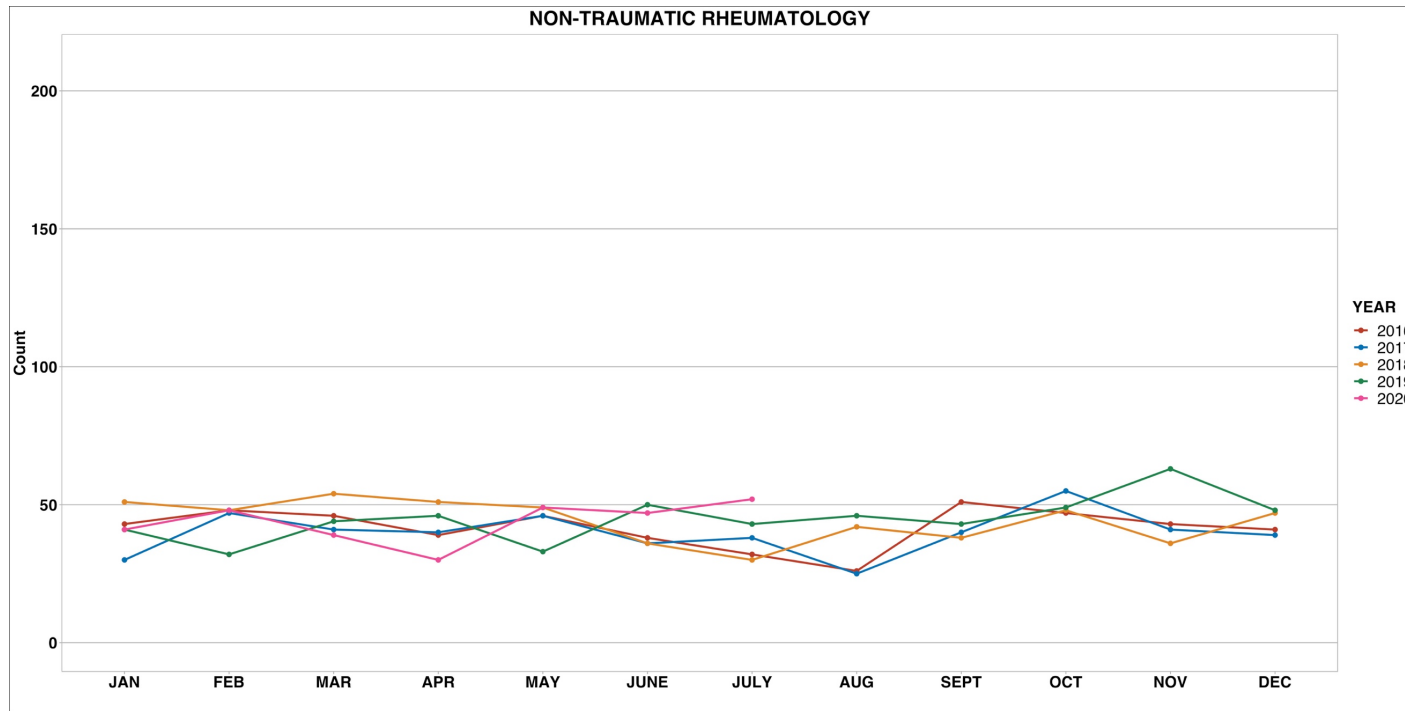



Panel c

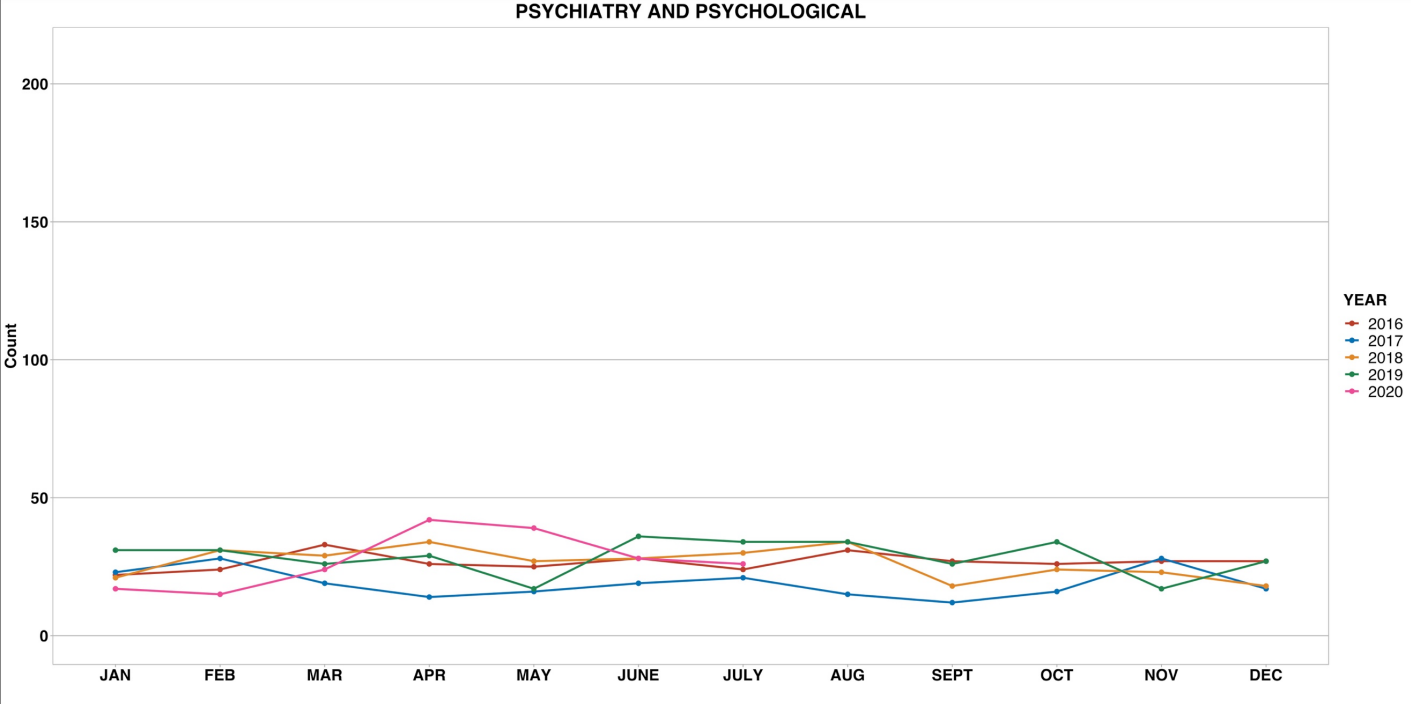

Panel d

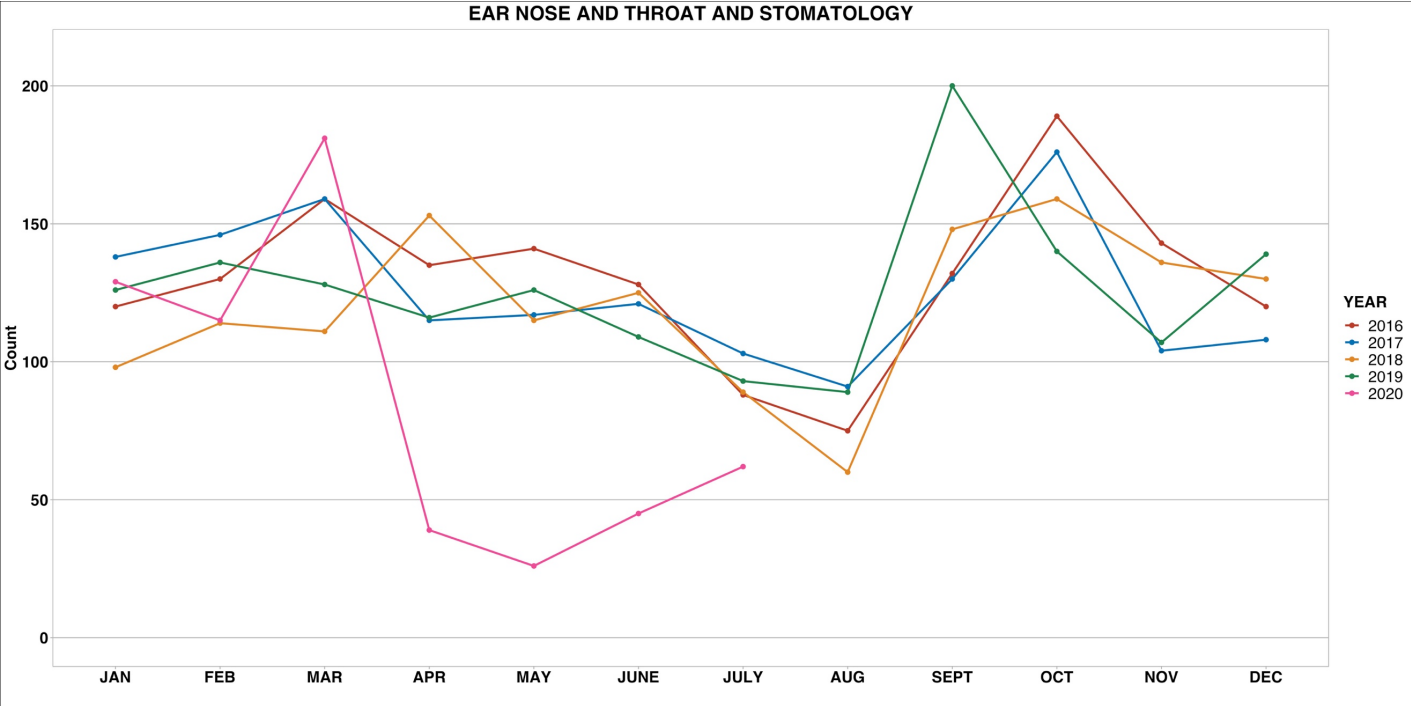

**e-Table 1. Characteristics of the consultations from April to May (2020) as compared to June to July (2020).**

|                                       | From April to May 2020 |                     |                    |           | From June to July 2020 |                      |                    |           |
|---------------------------------------|------------------------|---------------------|--------------------|-----------|------------------------|----------------------|--------------------|-----------|
|                                       | [ALL]<br>N=1270        | SENEGALESE<br>N=761 | CAUCASIAN<br>N=305 | p.overall | [ALL]<br>N=1703        | SENEGALESE<br>N=1064 | CAUCASIAN<br>N=336 | p.overall |
| AGE                                   | 42.5 (24.2)            | 43.9 (24.8)         | 39.1 (24.2)        | 0.004     | 45.1 (24.2)            | 46.6 (24.5)          | 39.9 (22.4)        | <0.001    |
| AGE_2:                                |                        |                     |                    | <0.001    |                        |                      |                    | 0.013     |
| 0_≤20                                 | 249 (19.6%)            | 138 (18.1%)         | 86 (28.2%)         |           | 285 (16.7%)            | 164 (15.4%)          | 72 (21.4%)         |           |
| 1_>20                                 | 1021 (80.4%)           | 623 (81.9%)         | 219 (71.8%)        |           | 1418 (83.3%)           | 900 (84.6%)          | 264 (78.6%)        |           |
| AGE_3:                                |                        |                     |                    | 0.001     |                        |                      |                    | 0.024     |
| 0_≤20                                 | 249 (19.6%)            | 138 (18.1%)         | 86 (28.2%)         |           | 285 (16.7%)            | 164 (15.4%)          | 72 (21.4%)         |           |
| 1_20-45                               | 443 (34.9%)            | 266 (35.0%)         | 85 (27.9%)         |           | 601 (35.3%)            | 376 (35.3%)          | 119 (35.4%)        |           |
| 2_≥45                                 | 578 (45.5%)            | 357 (46.9%)         | 134 (43.9%)        |           | 817 (48.0%)            | 524 (49.2%)          | 145 (43.2%)        |           |
| SEXE:                                 |                        |                     |                    | 0.022     |                        |                      |                    | 0.005     |
| F                                     | 720 (56.7%)            | 452 (59.4%)         | 157 (51.5%)        |           | 955 (56.1%)            | 623 (58.6%)          | 167 (49.7%)        |           |
| M                                     | 550 (43.3%)            | 309 (40.6%)         | 148 (48.5%)        |           | 748 (43.9%)            | 441 (41.4%)          | 169 (50.3%)        |           |
| PATHOLOGIE_3:                         |                        |                     |                    |           |                        |                      |                    |           |
| ALL TRAUMA                            | 100 (7.87%)            | 58 (7.62%)          | 25 (8.20%)         |           | 85 (4.99%)             | 44 (4.14%)           | 26 (7.74%)         |           |
| CARDIOVASCULAR                        | 100 (7.87%)            | 76 (9.99%)          | 15 (4.92%)         |           | 92 (5.40%)             | 67 (6.30%)           | 8 (2.38%)          |           |
| DERMATOLOGY                           | 29 (2.28%)             | 8 (1.05%)           | 18 (5.90%)         |           | 27 (1.59%)             | 11 (1.03%)           | 12 (3.57%)         |           |
| ENDOCRINOLOGY, METABOLIC TR           | 18 (1.42%)             | 16 (2.10%)          | 1 (0.33%)          |           | 28 (1.64%)             | 19 (1.79%)           | 5 (1.49%)          |           |
| ENT AND STOMATOLOGY (CHRONIC)         | 51 (4.02%)             | 37 (4.86%)          | 6 (1.97%)          |           | 38 (2.23%)             | 19 (1.79%)           | 11 (3.27%)         |           |
| ENT AND STOMATOLOGY (INFECTIOUS)      | 65 (5.12%)             | 36 (4.73%)          | 19 (6.23%)         |           | 107 (6.28%)            | 47 (4.42%)           | 42 (12.5%)         |           |
| HEMATO-ONCOLOGY                       | 6 (0.47%)              | 6 (0.79%)           | 0 (0.00%)          |           | 11 (0.65%)             | 7 (0.66%)            | 2 (0.60%)          |           |
| HEPATO-GASTRO-ENTEROLOGY (CHRONIC)    | 171 (13.5%)            | 100 (13.1%)         | 38 (12.5%)         |           | 156 (9.16%)            | 99 (9.30%)           | 30 (8.93%)         |           |
| HEPATO-GASTRO-ENTEROLOGY (INFECTIOUS) | 57 (4.49%)             | 30 (3.94%)          | 17 (5.57%)         |           | 67 (3.93%)             | 39 (3.67%)           | 16 (4.76%)         |           |
| INFECTIOLOGY                          | 117 (9.21%)            | 57 (7.49%)          | 39 (12.8%)         |           | 428 (25.1%)            | 254 (23.9%)          | 89 (26.5%)         |           |
| MEDICAL CARE                          | 19 (1.50%)             | 11 (1.45%)          | 7 (2.30%)          |           | 23 (1.35%)             | 18 (1.69%)           | 3 (0.89%)          |           |
| NEUROLOGY                             | 113 (8.90%)            | 74 (9.72%)          | 21 (6.89%)         |           | 109 (6.40%)            | 81 (7.61%)           | 15 (4.46%)         |           |
| NON-SPECIFIC DIAGNOSTICS              | 109 (8.58%)            | 75 (9.86%)          | 21 (6.89%)         |           | 160 (9.40%)            | 120 (11.3%)          | 12 (3.57%)         |           |
| NON-TRAUMATIC RHUMATOLOGY             | 79 (6.22%)             | 54 (7.10%)          | 11 (3.61%)         |           | 99 (5.81%)             | 70 (6.58%)           | 15 (4.46%)         |           |
| NON-TRAUMATOLOGY OPHTHALMOLOGY        | 14 (1.10%)             | 7 (0.92%)           | 6 (1.97%)          |           | 10 (0.59%)             | 4 (0.38%)            | 5 (1.49%)          |           |

|                                 |             |             |             |        |             |             |             |
|---------------------------------|-------------|-------------|-------------|--------|-------------|-------------|-------------|
| PNEUMOLOGY (CHRONIC)            | 34 (2.68%)  | 28 (3.68%)  | 2 (0.66%)   |        | 81 (4.76%)  | 57 (5.36%)  | 10 (2.98%)  |
| PNEUMOLOGY (INFECTIOUS)         | 19 (1.50%)  | 11 (1.45%)  | 7 (2.30%)   |        | 42 (2.47%)  | 28 (2.63%)  | 10 (2.98%)  |
| POISONING AND ADDICTION         | 6 (0.47%)   | 2 (0.26%)   | 2 (0.66%)   |        | 6 (0.35%)   | 4 (0.38%)   | 0 (0.00%)   |
| PSYCHIATRY AND PSYCHOLOGICAL PB | 81 (6.38%)  | 41 (5.39%)  | 18 (5.90%)  |        | 54 (3.17%)  | 31 (2.91%)  | 8 (2.38%)   |
| SOCIAL, ADM., FORENSIC PB       | 24 (1.89%)  | 9 (1.18%)   | 15 (4.92%)  |        | 39 (2.29%)  | 18 (1.69%)  | 10 (2.98%)  |
| UROGENITAL                      | 58 (4.57%)  | 25 (3.29%)  | 17 (5.57%)  |        | 41 (2.41%)  | 27 (2.54%)  | 7 (2.08%)   |
| PATHOLOGIE_4:                   |             |             |             | <0.001 |             |             | <0.001      |
| CHRONIC DISEASES                | 740 (58.3%) | 465 (61.1%) | 147 (48.2%) |        | 736 (43.2%) | 488 (45.9%) | 123 (36.6%) |
| INFECTIOUS DISEASES             | 258 (20.3%) | 134 (17.6%) | 82 (26.9%)  |        | 644 (37.8%) | 368 (34.6%) | 157 (46.7%) |
| OTHERS                          | 272 (21.4%) | 162 (21.3%) | 76 (24.9%)  |        | 323 (19.0%) | 208 (19.5%) | 56 (16.7%)  |
